# Supplementary material for: Biomass-derived aldehyde tanning agents with in situ dyeing properties: a ‘Two Birds with One Stone’ strategy for engineering chrome-free and dye-free colored leather
Source: Royal Society of Chemistry journal article supplement (doi:10.1039/d2gc00705c), 2022-01-01
Supplement: d2gc00705c1.pdf [file d2gc00705c1.pdf]

## Electronic Supplementary Information

### **Biomass-derived aldehyde tanning agents with in-situ dyeing properties: a ‘Two Birds with One Stone’ strategy for engineering chrome-free and dye-free colored leather**

Wei Ding <sup>a,b\*</sup>, Javier Remón <sup>c</sup>, Zhicheng Jiang <sup>d\*</sup>

<sup>a</sup> China Leather and Footwear Research Institute Co. Ltd., Beijing 100015, P. R. China

<sup>b</sup> Key Laboratory of Leather and Footwear Green Manufacturing Technology of China Light Industry, Beijing 100015, P. R. China

<sup>c</sup> Instituto de Carboquímica, CSIC, Zaragoza, 50018, Spain

<sup>d</sup> National Engineering Research Center of Clean Technology in Leather Industry, Sichuan University, Chengdu, 610065, P. R. China

\*Corresponding Authors:

**Wei Ding**, E-mail: dingwei1368@outlook.com, Tel: 86-010-64337806.

**Zhicheng Jiang**, E-mail: zhichengjiang@scu.edu.cn.

## 1. Post-tanning trials

The BAT-tanned leather was wrung, shaved (1.0 mm) and weighted. Then, it was filled, dyed, fatliquored according to the processes shown in Table S1. The chemical offer was based on the weight of shaved leather. The post-tanned leather was further dried and milled to obtain crust leathers. Similarly, the DAT-tanned leather was treated according to the processes shown in Table S2, and then dried and milled to obtain crust leathers.

**Table S1.** Post-tanning trials for BAT-tanned leather.

| Process                             | Chemicals          | Offer/% | T/°C | t/min   | Remarks        |
|-------------------------------------|--------------------|---------|------|---------|----------------|
| Wetting                             | Water              | 100     | 40   |         |                |
|                                     | Degreasing agent   | 0.5     |      |         |                |
|                                     | Formic acid        | 1.0     |      | 40      | pH=6.0±, Drain |
| Retanning,<br>Filling and<br>Dyeing | Water              | 100     | 35   |         |                |
|                                     | Acrylic resin      | 3.0     |      |         |                |
|                                     | Dispersing syntan  | 1.0     |      | 30      |                |
|                                     | Amine resin        | 2.5     |      |         |                |
|                                     | <b>Leather dye</b> | 2.0     |      | 30      | SD/CD          |
|                                     | Dispersing syntan  | 1.0     |      |         |                |
|                                     | Wattle extract     | 4.0     |      | 60      |                |
| Formic acid                         | 0.5×n              |         | 15×n | pH=4.0± |                |
|                                     |                    |         | 30   | Drain   |                |

|              |                       |       |    |      |            |
|--------------|-----------------------|-------|----|------|------------|
|              | Water                 | 150   | 50 |      |            |
|              | Protein filling agent | 1.0   |    | 10   |            |
| Fatliquoring | Synthetic fatliquor   | 4.0   |    |      |            |
|              | Compounded fatliquor  | 4.0   |    |      |            |
|              | Formic acid           | 0.5×n |    | 15×n | pH=3.6-3.8 |
|              |                       |       |    | 30   | Drain      |
| Washing      | Water                 | 400×3 | RT | 10×3 | Drain      |

**Table S2.** Post-tanning trials for DAT-tanned leather.

| Process                  | Chemicals         | Offer/% | T/°C | t/min | Remarks        |
|--------------------------|-------------------|---------|------|-------|----------------|
|                          | Water             | 100     | 40   |       |                |
| Wetting                  | Degreasing agent  | 0.5     |      |       |                |
|                          | Formic acid       | 1.0     |      | 40    | pH=6.0±, Drain |
|                          | Water             | 100     | 35   |       |                |
|                          | Acrylic resin     | 3.0     |      |       |                |
| Retanning<br>and Filling | Dispersing syntan | 1.0     |      | 30    |                |
|                          | Amine resin       | 2.5     |      |       |                |
|                          | Formic acid       | 0.5×n   |      | 15×n  | pH=4.0±        |
|                          |                   |         |      | 30    | Drain          |

|              |                       |       |    |      |            |
|--------------|-----------------------|-------|----|------|------------|
|              | Water                 | 150   | 50 |      |            |
|              | Protein filling agent | 1.0   |    | 10   |            |
| Fatliquoring | Synthetic fatliquor   | 4.0   |    |      |            |
|              | Compounded fatliquor  | 4.0   |    |      |            |
|              | Formic acid           | 0.5×n |    | 15×n | pH=3.6-3.8 |
|              |                       |       |    | 30   | Drain      |
| Washing      | Water                 | 400×3 | RT | 10×3 | Drain      |
